# Supplementary material
Source: PubMed Central journal article supplement (PMC9749650)

# SARS-CoV-2 Cellular Tropism

| Panel | Specimen                                                | Case(s)                | Cell type(s)                                                            |
|-------|---------------------------------------------------------|------------------------|-------------------------------------------------------------------------|
| a     | Sinus turbinate                                         | P42                    | Mucus secreting epithelium                                              |
| b     | Lip, oral mucosa                                        | P18                    | Squamous epithelium                                                     |
| c     | Lip, minor salivary gland                               | P18                    | Minor salivary gland (lip)                                              |
| d     | Bronchus                                                | P18                    | Bronchial epithelium, endothelium (^)                                   |
| e     | Bronchus                                                | P20                    | Mucus secreting epithelium                                              |
| f     | Lung                                                    | P42                    | Pneumocytes, Type I (*) Type II (#)                                     |
| g     | Lung                                                    | P24                    | Hyaline membrane (*) mononuclear leukocyte (#) (60X)                    |
| h     | Heart                                                   | P19                    | Cardiac myocyte                                                         |
| i     | Aorta                                                   | P19                    | Tunica intima                                                           |
| j     | Aorta                                                   | P19                    | Tunica media                                                            |
| k     | Trachea                                                 | P19                    | Endothelium(*), smooth muscle (#)                                       |
| l     | Esophagus                                               | P18                    | Stratified squamous epithelium                                          |
| m     | Appendix                                                | P19                    | Colonic epithelium(*), mononuclear leukocytes (#)                       |
| n     | Colon                                                   | P16                    | Colonic epithelium(*), mononuclear leukocytes (#)                       |
| o     | Liver                                                   | P19                    | Hepatocyte (*), bile duct epithelium (#)                                |
| p     | Liver                                                   | P19                    | Hepatocyte (*), Kupffer cell (#)                                        |
| q     | Pancreas                                                | P18                    | Exocrine pancreatic cells                                               |
| r     | Adrenal gland                                           | P19                    | Adrenal cortical epithelium                                             |
| s     | Thyroid                                                 | P19                    | Follicular cells                                                        |
| t     | Kidney                                                  | P18                    | Glomerular epithelium                                                   |
| u     | Kidney                                                  | P18                    | Tubular epithelium                                                      |
| v     | Uterus                                                  | P35                    | Endometrial stroma (*), endometrial glandular epithelium (#)            |
| w     | Uterus                                                  | P35                    | Myometrium                                                              |
| x     | Ovary                                                   | P20                    | Ovarian stromal cells                                                   |
| y     | Testis                                                  | P20                    | Sertoli cells (*), spermatid (#)                                        |
| z     | Testis                                                  | P20                    | Sertoli cells (*), Leydig cells (#)                                     |
| aa    | Testis, seminiferous tubules                            | P19                    | Seminiferous tubule epithelium                                          |
| bb    | Lymph node                                              | P19                    | Mononuclear leukocytes                                                  |
| cc    | Lymph node                                              | P19                    | Mononuclear leukocytes                                                  |
| dd    | Spleen                                                  | P19                    | Mononuclear leukocytes                                                  |
| ee    | Pancreas                                                | P18                    | Arterial smooth muscle                                                  |
| ff    | Ileum                                                   | P19                    | Intestinal epithelium (*), smooth muscle (#)                            |
| gg    | Trachea                                                 | P27                    | Chondrocyte (60X)                                                       |
| hh    | Skin                                                    | P43                    | Epithelium, outer root sheath of a hair follicle                        |
| ii    | Pericardium                                             | P18                    | Fibroblast                                                              |
| jj    | Bronchus                                                | P43                    | Endothelium (*), smooth muscle (#)                                      |
| kk    | Psoas muscle                                            | P18                    | Skeletal muscle                                                         |
| ll    | Sciatic nerve                                           | P20                    | Schwann cells                                                           |
| mm    | Brain, frontal lobe                                     | P40                    | NOS                                                                     |
| nn    | Brain, parietal lobe                                    | P38                    | NOS                                                                     |
| oo    | Brain, occipital lobe                                   | P38                    | Endothelium (#), NOS (*)                                                |
| pp    | Brain, corpus callosum                                  | P38                    | NOS                                                                     |
| qq    | Brain, thalamus                                         | P33                    | NOS                                                                     |
| rr    | Brain, hypothalamus                                     | P40                    | NOS                                                                     |
| ss    | Brain, basal ganglia                                    | P40                    | NOS                                                                     |
| tt    | Brain, midbrain                                         | P43                    | NOS                                                                     |
| uu    | Brain, cerebellum                                       | P42                    | Granular layer neurons                                                  |
| vv    | Cervical spinal cord                                    | P38                    | Ependymal cells                                                         |
| ww    | Brain, temporal lobe                                    | P43                    | NOS                                                                     |
| xx    | Cervical spinal cord                                    | P40                    | NOS within white matter                                                 |
| yy    | Lung and basal ganglia                                  | Pre-pandemic, P40      | Table of chromogenic IHC and ISH validation images                      |
| zz    | Basal ganglia, cervical spinal cord, lung, hypothalamus | Pre-pandemic, P42, P38 | IF validation images                                                    |
| aaa   | Hypothalamus, cervical spinal cord, and cerebellum      | P38, P42               | Table of additional chromogenic IHC and ISH control images for Fig. 3   |
| bbb   | Cortex, brain NOS, cervical spinal cord, and cerebellum | Pre-pandemic           | Table of additional CNS chromogenic and ISH validation images           |
| ccc   |                                                         |                        | Table of ddPCR vs. ISH quantification on heart, interventricular septum |
| ddd   | Heart, interventricular septum                          | P18, P29               | Examples of image analysis with and without markup                      |

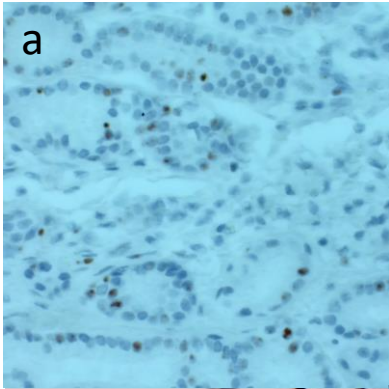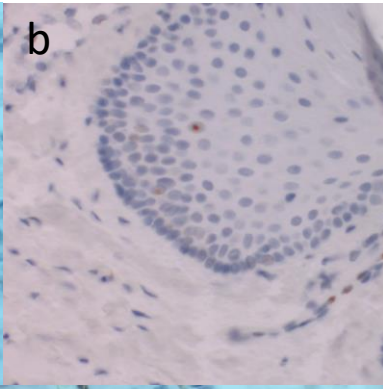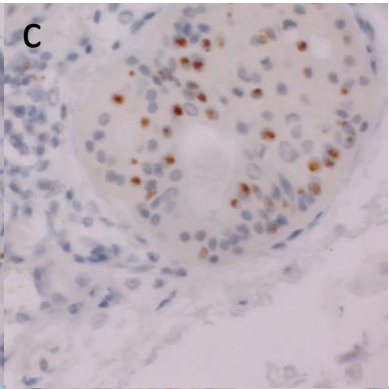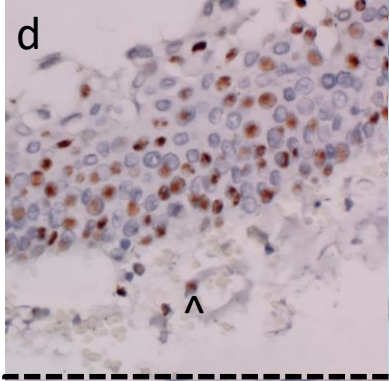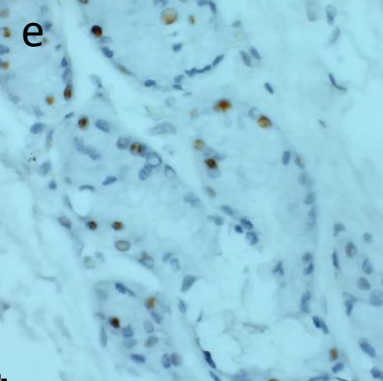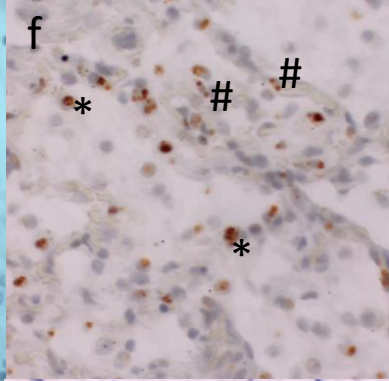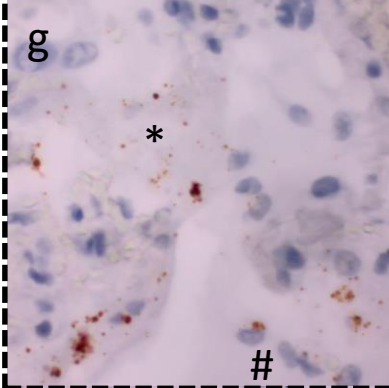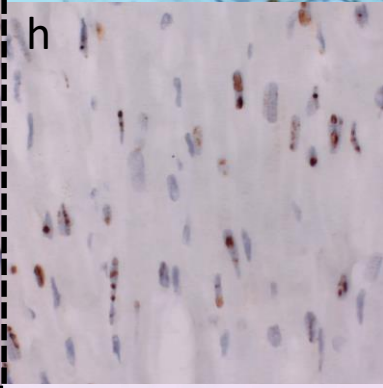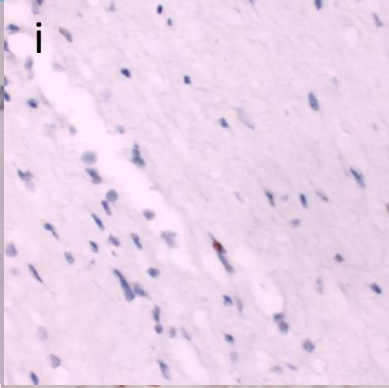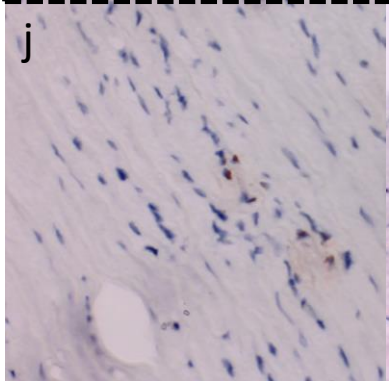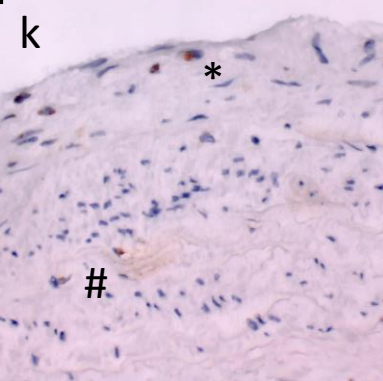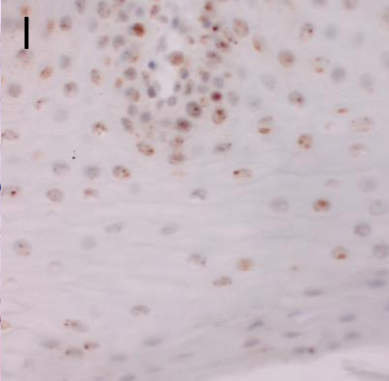



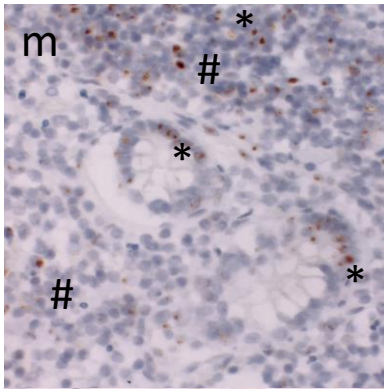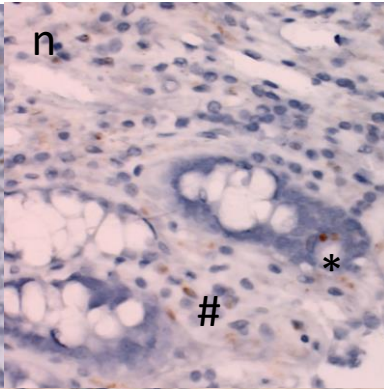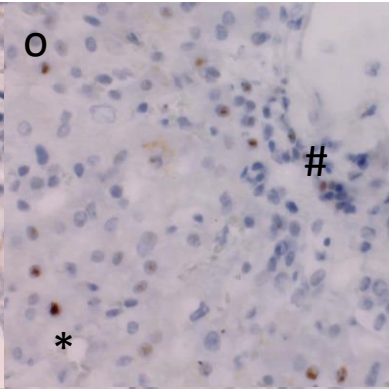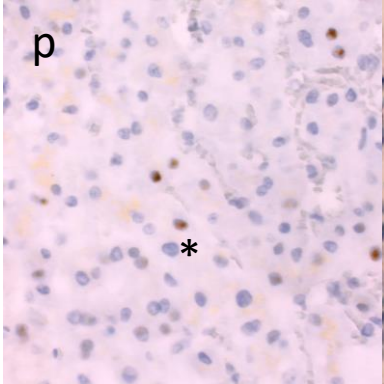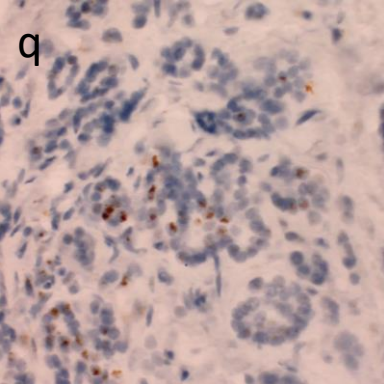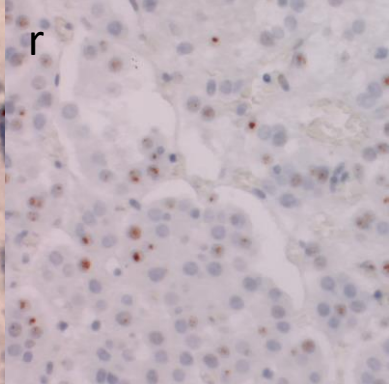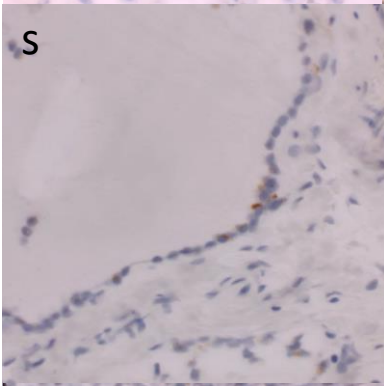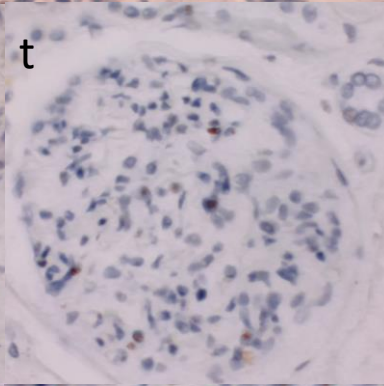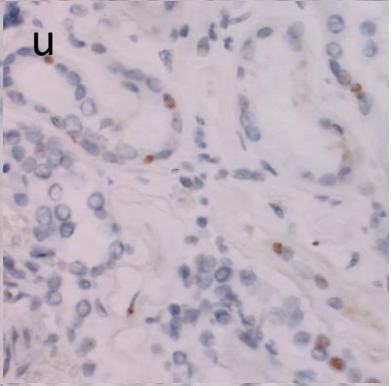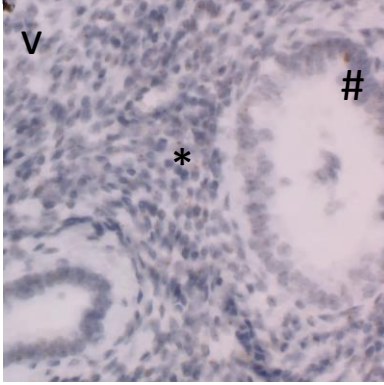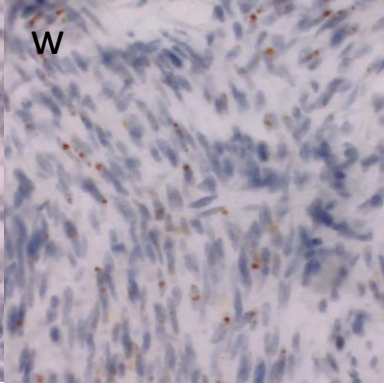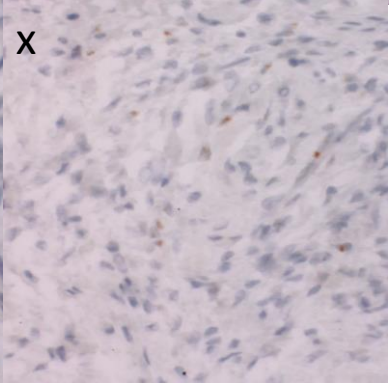

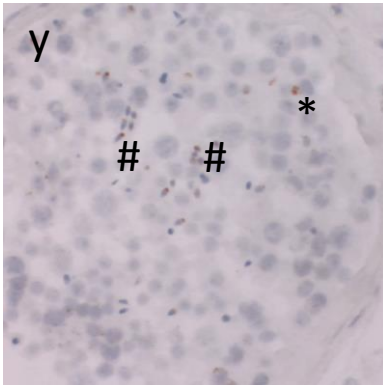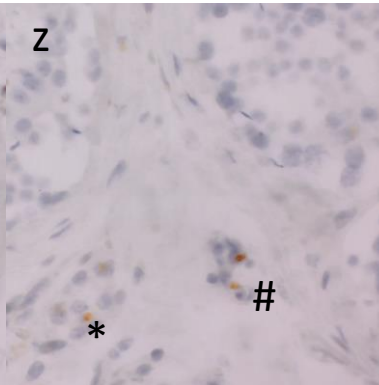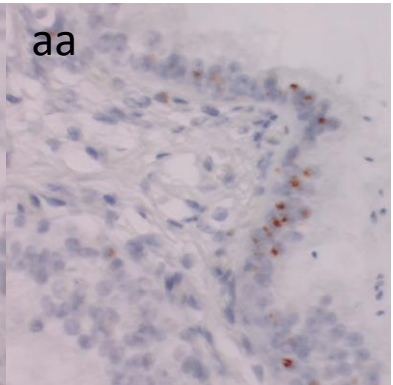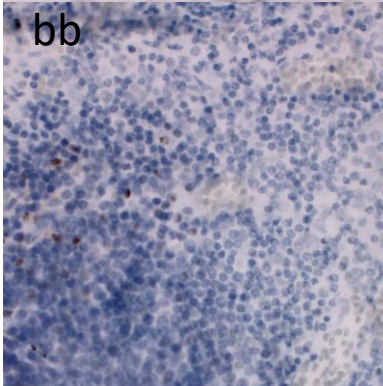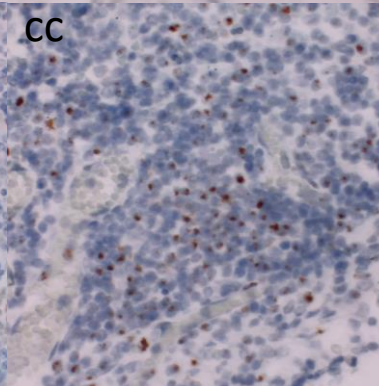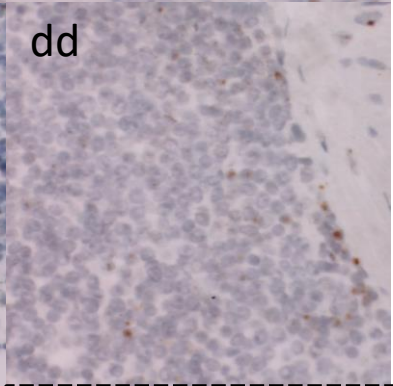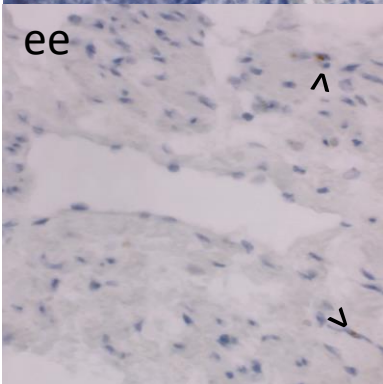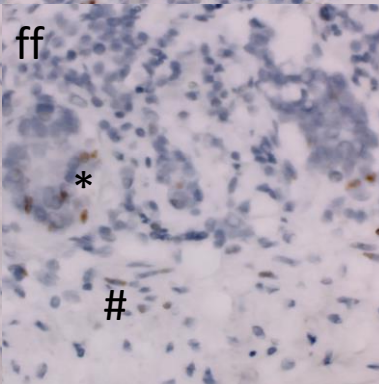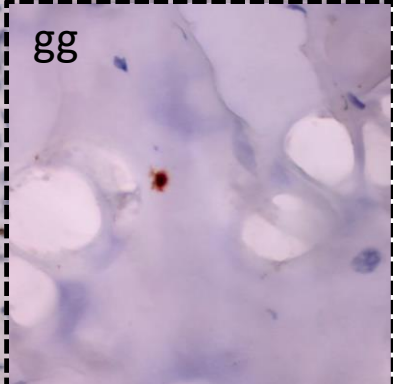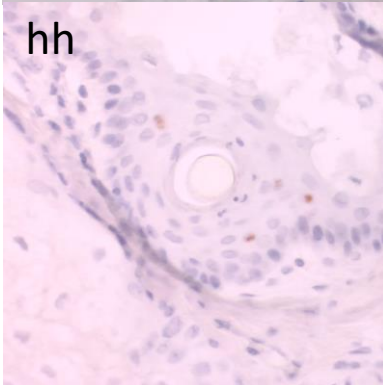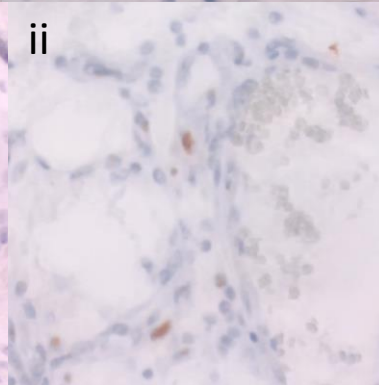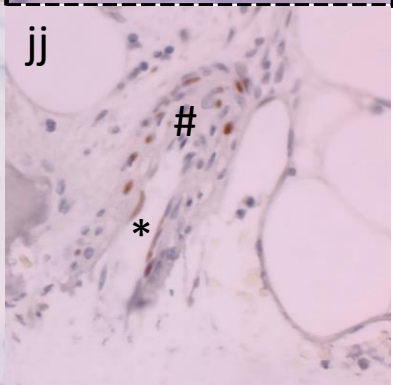



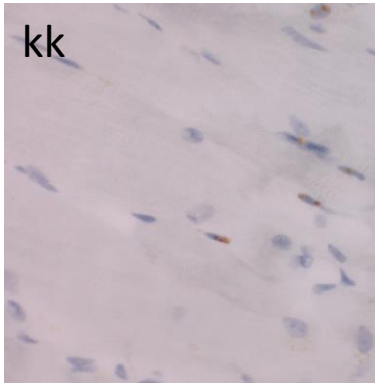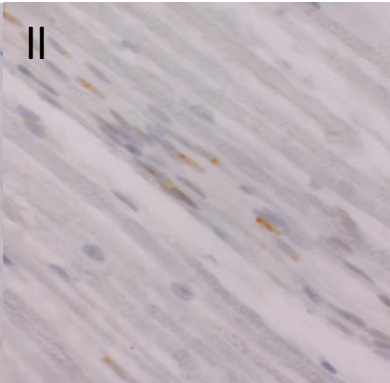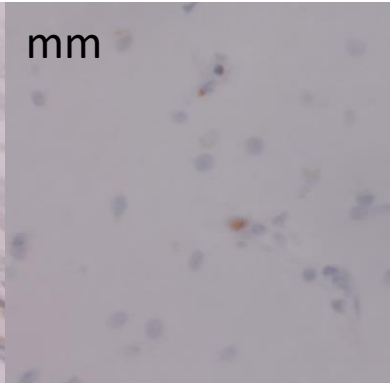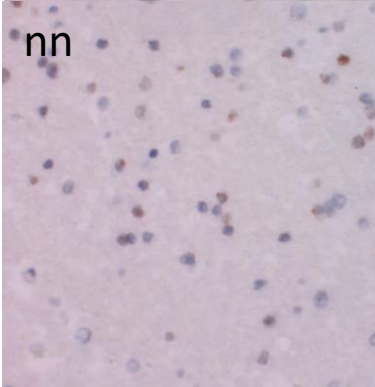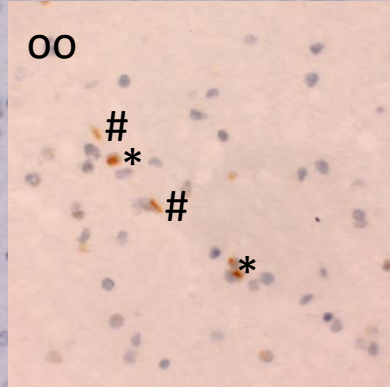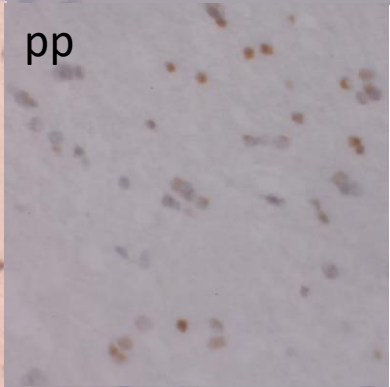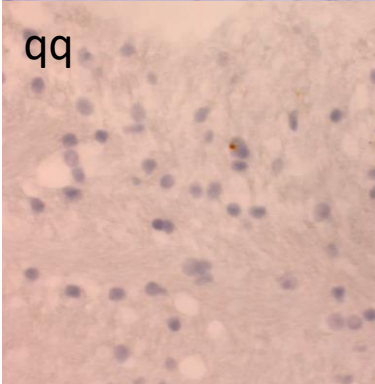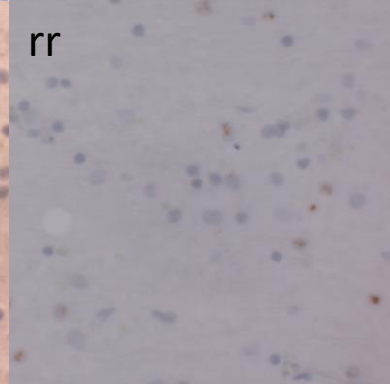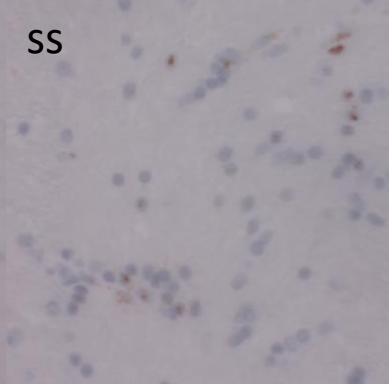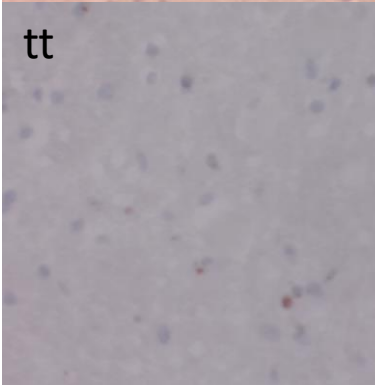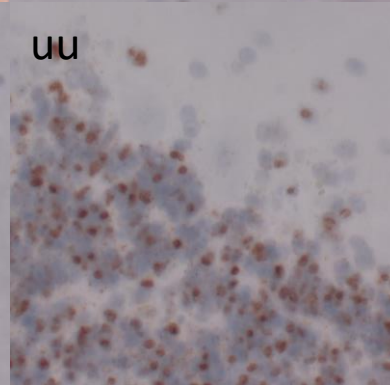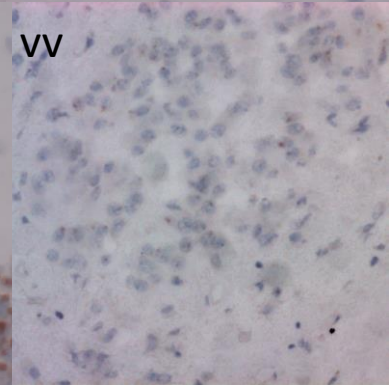

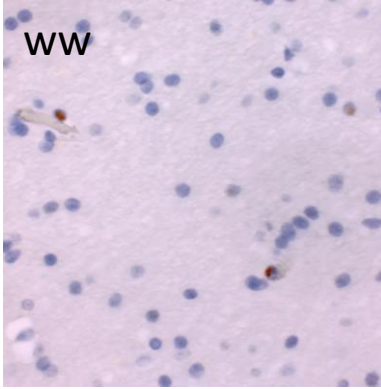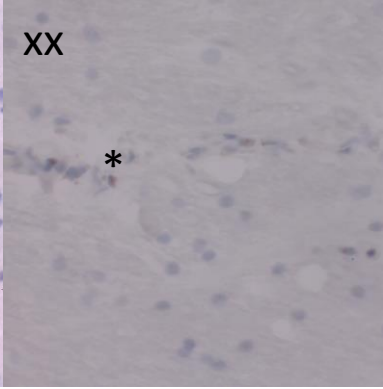

| YY                               |                                          | Lung |              | Brain, basal ganglia |              |
|----------------------------------|------------------------------------------|------|--------------|----------------------|--------------|
|                                  |                                          | P18  | Pre-pandemic | P40                  | Pre-pandemic |
| Chromogenic immunohistochemistry | Anti-nucleocapsid Ab                     |      |              |                      |              |
|                                  | Rabbit IgG isotype control               |      |              |                      |              |
| <i>In situ</i> hybridization     | Spike                                    |      |              |                      |              |
|                                  | Nucleocapsid                             |      |              |                      |              |
|                                  | Positive control human housekeeping gene |      |              |                      |              |
|                                  | Negative Control <i>E. coli</i> gene     |      |              |                      |              |



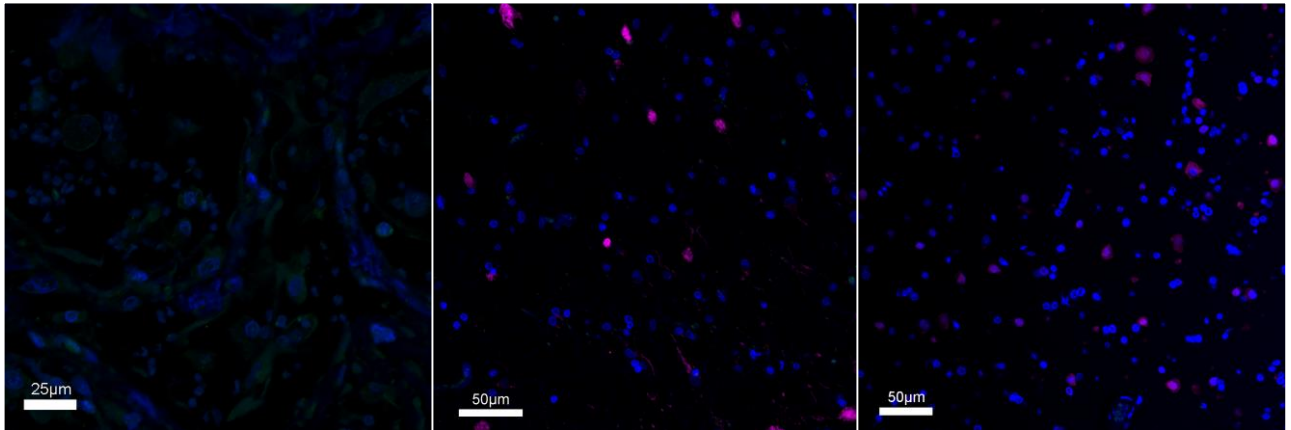

Pre-pandemic lung  
Immunofluorescence, 20x

Pre-pandemic basal ganglia  
Immunofluorescence, 20x

Pre-pandemic spinal cord  
Immunofluorescence, 20x

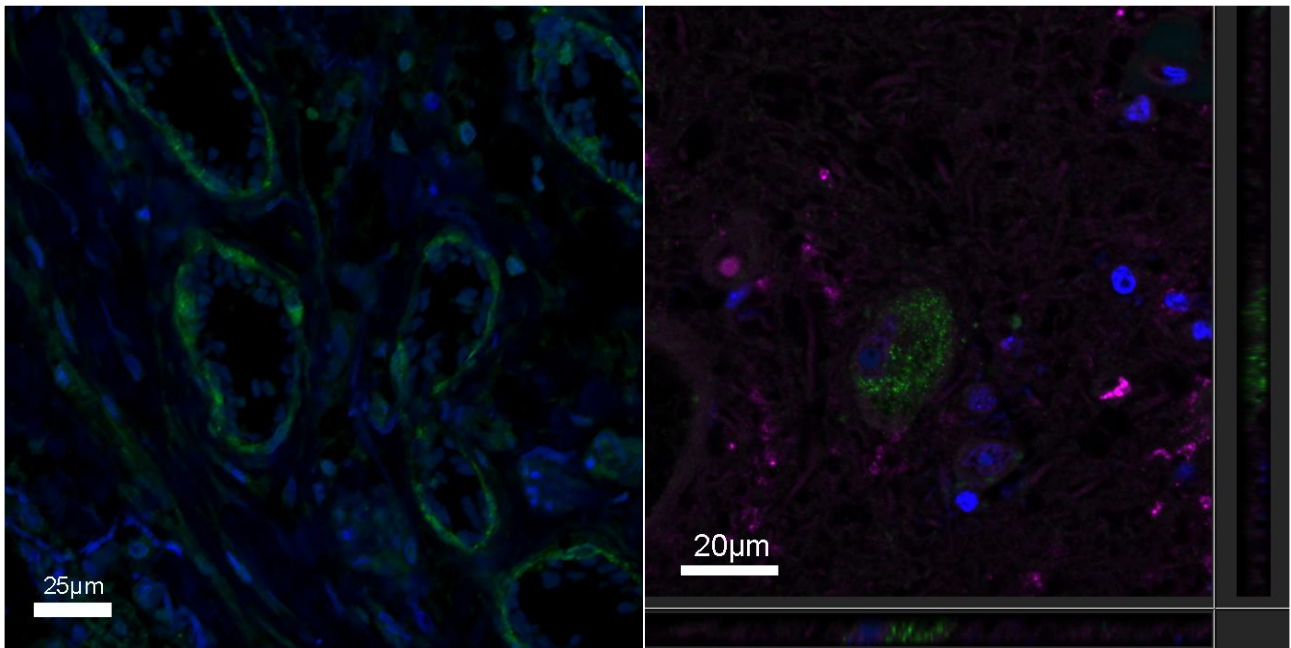

Lung, P42  
Immunofluorescence, 20x

Hypothalamus, P38  
Immunofluorescence, 63x

zz) To confirm SARS-CoV-2 antibody specificity within CNS and lung tissues, sections of pre-pandemic lung (top left), basal ganglia (top middle), and spinal cord (top right) were labeled with primary antibodies against NP1 (lung and CNS, green) and NeuN (CNS only, magenta). As a positive control, lung from P42 was labeled for SARS-CoV-2 NP1 (bottom left, green). Within the CNS, microglial cells were identified via TMEM119 labeling (bottom right, magenta) and were consistently found to be negative for SARS-CoV-2 protein (green). Hoechst 33342 was used to identifying nuclei and is shown in blue.



aaa

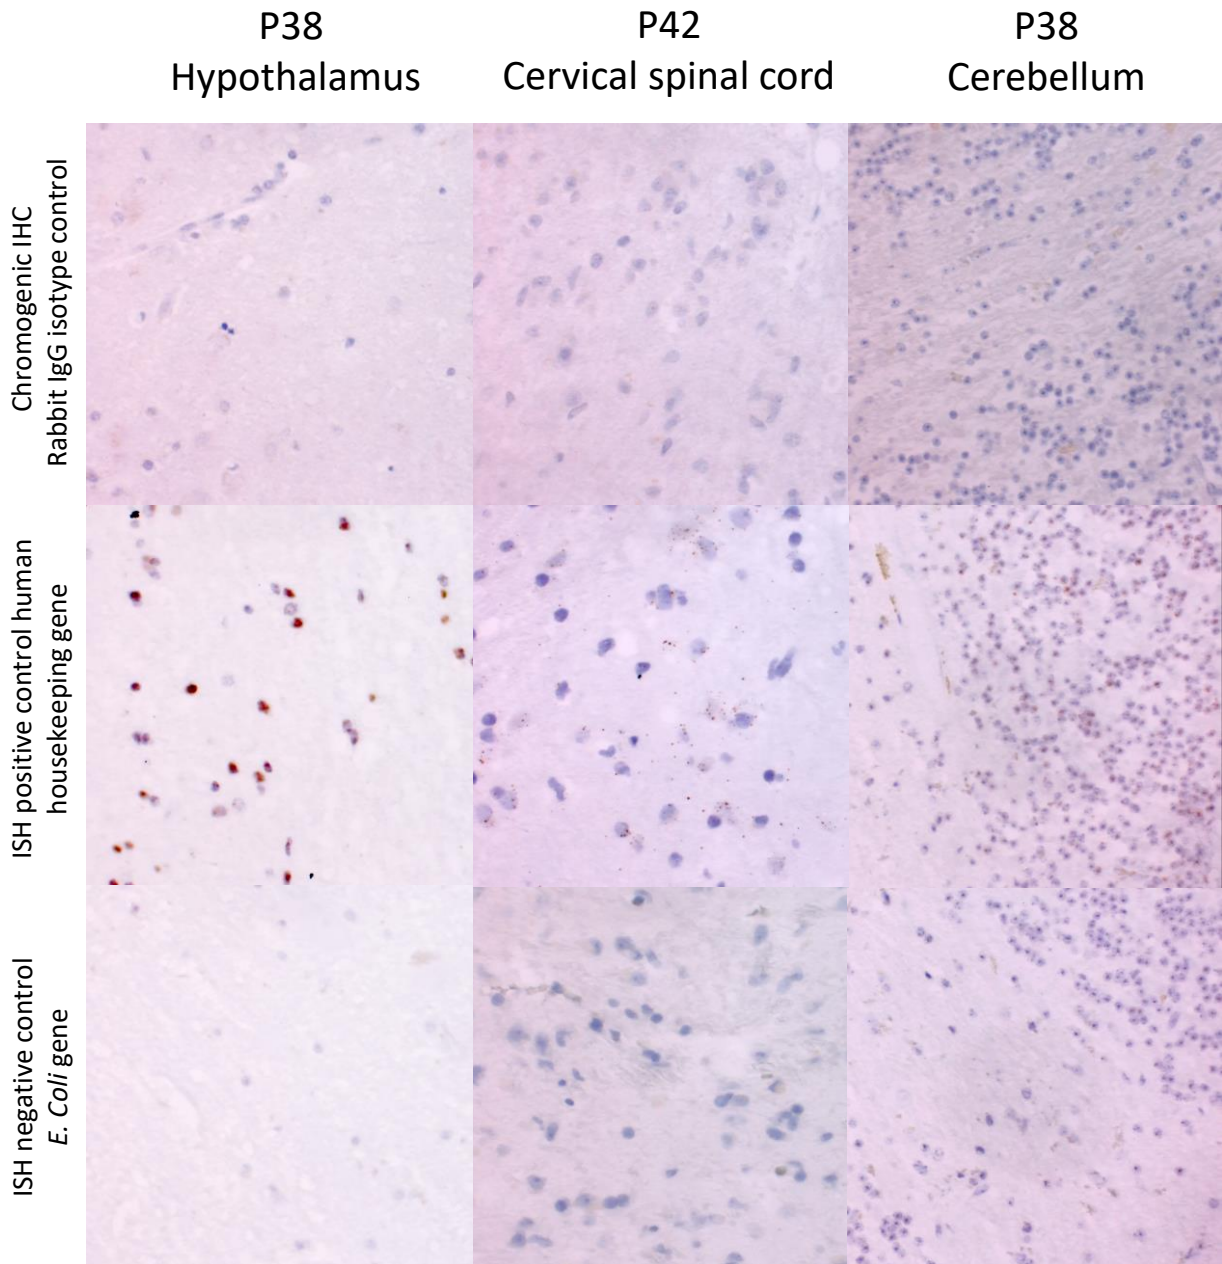

RNA ISH and chromogenic IHC controls from P40 are contained in panel yy (page 7)

bbb

|                                  |                                          | Pre-pandemic Cortex                                                                 | Pre-pandemic CNS (NOS)                                                              | Pre-pandemic spinal cord                                                            | Pre-pandemic cerebellum                                                             |
|----------------------------------|------------------------------------------|-------------------------------------------------------------------------------------|-------------------------------------------------------------------------------------|-------------------------------------------------------------------------------------|-------------------------------------------------------------------------------------|
| Chromogenic immunohistochemistry | Anti-nucleocapsid Ab                     | 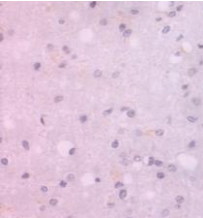   |    |    |   |
|                                  | Rabbit IgG isotype control               |    |    |    |   |
| <i>In situ</i> hybridization     | Spike                                    |   |   |   |  |
|                                  | Nucleocapsid                             |  |  |  |                                                                                     |
|                                  | Positive control human housekeeping gene |  |  |  |                                                                                     |
|                                  | Negative Control E. coli gene            |  |  |  |                                                                                     |

Adequate pre-pandemic ISH controls were not available for cerebellum

CCC

| <i>in situ</i> hybridization quantification of interventricular septum (n=16) |                                  |                         |
|-------------------------------------------------------------------------------|----------------------------------|-------------------------|
| Patient ID                                                                    | ddPCR N copies per ng RNA (mean) | Positive cells (median) |
| P18                                                                           | 60.2478                          | 110.0                   |
| P37                                                                           | 47.3838                          | 80.5                    |
| P27                                                                           | 24.1469                          | 50.5                    |
| P32                                                                           | 14.7105                          | 46.0                    |
| P24                                                                           | 4.2594                           | 74.5                    |
| P16                                                                           | 1.0061                           | 28.0                    |
| P21                                                                           | 0.5922                           | 23.0                    |
| P7                                                                            | 0.3116                           | 89.5                    |
| P39                                                                           | 0.1489                           | 26.5                    |
| P38                                                                           | 0.0632                           | 52.0                    |
| P15                                                                           | 0.0519                           | 52.5                    |
| P29                                                                           | 0.0081                           | 21.5                    |
| P42                                                                           | 0.0027                           | 28.0                    |
| P12                                                                           | 0.0000                           | 21.0                    |
| P17                                                                           | 0.0000                           | 18.0                    |
| P31                                                                           | 0.0000                           | 26.0                    |

ddd

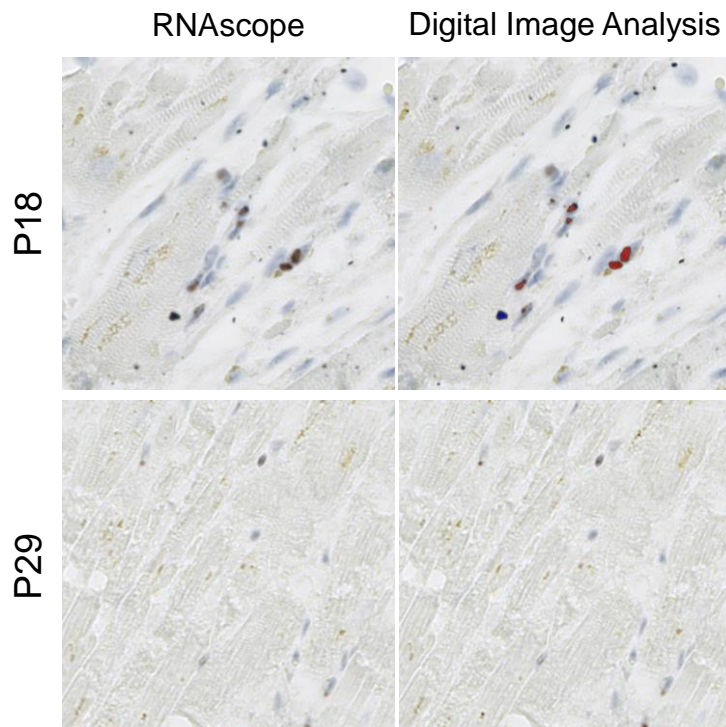

Supplement: 41586_2022_5542_MOESM5_ESM.pdf [file 41586_2022_5542_MOESM5_ESM.pdf]
